# Supplementary material for: Enabling Urban Logistics Services at La Poste through Multi-Echelon Location-Routing
Source: Atypon-hosted journal article supplement (doi:10.1287/trsc.2015.0624), 2015-10-15
Supplement: trsc.2015.0624-sm_online_supplement.pdf [file trsc.2015.0624-sm_online_supplement.pdf]

# Enabling Urban Logistics Services at *La Poste* through Multi-Echelon Location-Routing

—

## Online Supplement

Matthias Winkenbach

WHU – Otto Beisheim School of Management, Burgplatz 2, 56179 Vallendar, Germany, matthias.winkenbach@whu.edu

Paul R. Kleindorfer (†)

INSEAD, Boulevard de Constance, 77305 Fontainebleau, France, paul.kleindorfer@insead.edu

Stefan Spinler

WHU – Otto Beisheim School of Management, Burgplatz 2, 56179 Vallendar, Germany, stefan.spinler@whu.edu

---

### 1. Capacitated Vehicle Routing

For the vehicle routing aspect of this work we consider a special case of the capacitated vehicle routing problem (CVRP) in which vehicle routes are capacity restricted in two ways: (i) vehicle carrying capacities may not be exceeded; and (ii) the total travel time of each vehicle may not exceed the global maximum service time (MST) constraint. The CVRP is a hard combinatorial optimization problem, and only instances of limited size can be solved exactly to optimality (Cordeau et al. 2002). Thus, since the 1960s, numerous heuristics and meta-heuristics for the CVRP have been proposed (for recent surveys, see e.g. Golden et al. (2008) and Laporte (2009)).

Early works on solving the CVRP, often referred to as *classical heuristics*, generally perform a rather limited exploration of the search space and thus yield feasible solutions within very short computation times; see, for example, Clarke and Wright (1964), Gillett and Miller (1974), Fisher and Jaikumar (1981). The high solution speed of these heuristics comes at the cost of solution

values that are from 2% to 10% higher than the optimum or the best known solution (Laporte et al. 2000, Cordeau et al. 2002, Gendreau et al. 2001).

Since the 1990s, research has mainly focused on developing *meta-heuristics* for the CVRP that build on exploring promising regions of the solution space more intensively by incorporating principles such as local or neighborhood search, population search, memory structures, and solution recombination (cf. Cordeau et al. 2002, Laporte et al. 2000). Although these meta-heuristics produce solution values that are often within 0.5% of the optimum or the best known solution (Gendreau et al. 2001), they typically require substantial amounts of computation time (Cordeau et al. 2002).

In their reviews of vehicle routing problem (VRP) meta-heuristics, Laporte et al. (2000) and Gendreau et al. (2001) conclude that tabu search (TS) meta-heuristics have proven most effective in the past and have significant potential for future improvements, e.g. by exploiting the principle of granularity to form more compact yet more promising local search neighborhoods (cf. Toth and Vigo 2003), as well as by the use parallel computing (for a survey, see e.g. Crainic 2008). More recent applications of parallel solution approaches to the CVRP include Doerner et al. (2006), Groër et al. (2011), Cordeau and Maischberger (2012), and Jin et al. (2012).

## 2. Stop Density Dilution and Stop Multiplication

Equations (36) and (37) in the main document reveal that the extent to which architecture-specific expected stop densities  $\hat{\gamma}_i^S$  and  $\hat{\gamma}_i^L$  deteriorate relative to the global stop density  $\gamma_i$  is closely linked to the nature of  $N_i^P$  and  $N_i^D$ , the probability distributions of the numbers of pickup and delivery items per stop in the respective city segment. If the expected values of these numbers are sufficiently large and if their coefficients of variation ( $c_i^P$  and  $c_i^D$ ) are sufficiently small, then  $\hat{\gamma}_i^S$  and  $\hat{\gamma}_i^L$  remain relatively close to the level of  $\gamma_i$  as  $\lim_{E[N_i^P], E[N_i^D] \rightarrow \infty} p_i^{\gamma, S}, p_i^{\gamma, L} = 1$  holds. The lower the expected values of  $N_i^P$  and  $N_i^D$  and the higher their coefficients of variation, the stronger the stop density dilution effect. We can show in particular that, as  $c_i^P, c_i^D \rightarrow 0$ ,

$$\begin{aligned} \lim_{E[N_i^P], E[N_i^D] \rightarrow 1} p_i^{\gamma, S} &= 1 - p_i^{P, L} p_i^{D, L}, \\ \lim_{E[N_i^P], E[N_i^D] \rightarrow 1} p_i^{\gamma, L} &= p_i^{P, S} + p_i^{D, S} - p_i^{P, S} p_i^{D, S}, \\ \lim_{E[N_i^P], E[N_i^D] \rightarrow 0} p_i^{\gamma, S}, p_i^{\gamma, L} &= 0. \end{aligned}$$

In Figure 1 we plot the stop density dilution effect as a function of the expected number of items per stop for different values of  $\alpha$ . The figure also shows that the volume-weighted average of the network-specific stop densities is always less than or equal to the global stop density  $\gamma_i$ . That average's convexity over  $\alpha$  is decreasing in the expected number of items per stop,  $E[N_i^P] + E[N_i^D]$ . The stop density dilution effect is a major contributor to the total cost of operation's concavity

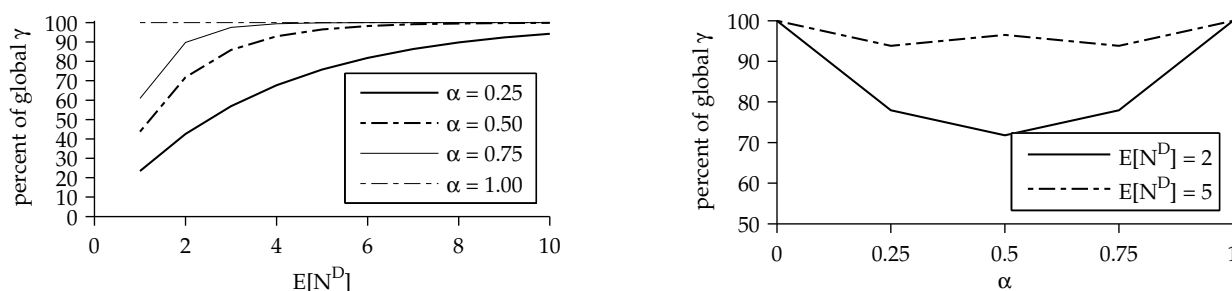

**Figure 1** Stop density dilution. Left:  $3/T/T$ -network-specific stop density as a percentage of global stop density. Right: Volume-weighted average of network-specific stop densities as a percentage of global stop density.

over  $\alpha$  because it makes cost components that are sensitive to the stop density (e.g., the cost for an inter-stop transfer) a concave function over  $\alpha$ .

Our numerical analyses suggest also that the overall number of stops—and likewise some major contributors to the total cost of operation—are concave functions over  $\alpha$ . Hence the stop multiplication effect, unlike stop density dilution, is increasing in the expected number of items per stop. As a result, the net effect of the expected number of items per stop on the concavity (over  $\alpha$ ) of total operational costs is ambiguous.

## References

- Clarke, G., J.W. Wright. 1964. Scheduling of vehicles from a central depot to a number of delivery points. *Operations Research* **12**(4) 568–581.
- Cordeau, J.-F., M. Gendreau, G. Laporte, J.-Y. Potvin, F. Semet. 2002. A guide to vehicle routing heuristics. *Journal of the Operational Research Society* **53**(5) 512–522.
- Cordeau, J.-F., M. Maischberger. 2012. A parallel iterated tabu search heuristic for vehicle routing problems. *Computers & Operations Research* **39**(9) 2033–2050.
- Doerner, K.F., R.F. Hartl, S. Benkner, M. Lucka. 2006. Parallel cooperative savings based ant colony optimization – multiple search and decomposition approaches. *Parallel Processing Letters* **16**(03) 351–369.
- Fisher, M.L., R. Jaikumar. 1981. A generalized assignment heuristic for vehicle routing. *Networks* **11**(2) 109–124.
- Gendreau, M., G. Laporte, J.-Y. Potvin. 2001. Metaheuristics for the capacitated VRP. P. Toth, D. Vigo, eds., *The Vehicle Routing Problem*. Society for Industrial and Applied Mathematics, 129–154.
- Gillett, B.E., L.R. Miller. 1974. A heuristic algorithm for the vehicle-dispatch problem. *Operations Research* **22**(2) 340–349.
- Golden, B.L., S. Raghavan, E.A. Wasil, eds. 2008. *The vehicle routing problem: Latest advances and new challenges*, *Operations Research/Computer Science Interfaces Series*, vol. 43. Springer US.

- Groër, C., B.L. Golden, E.A. Wasil. 2011. A parallel algorithm for the vehicle routing problem. *INFORMS Journal on Computing* **23**(2) 315–330.
- Jin, J., T.G. Crainic, A. Løkketangen. 2012. A parallel multi-neighborhood cooperative tabu search for capacitated vehicle routing problems. *European Journal of Operational Research* **222**(3) 441–451.
- Laporte, G. 2009. Fifty years of vehicle routing. *Transportation Science* **43**(4) 408–416.
- Laporte, G., M. Gendreau, J.-Y. Potvin, F. Semet. 2000. Classical and modern heuristics for the vehicle routing problem. *International transactions in operational research* **7**(4-5) 285–300.
- Toth, P., D. Vigo. 2003. The granular tabu search and its application to the vehicle-routing problem. *INFORMS Journal on Computing* **15**(4) 333–346.
